# Supplementary material
Source: Springer Nature journal article supplement (https://www.springermedizin.de/resource/supplementary/12943_2010_724_MOESM1_ESM.PDF/9554662)

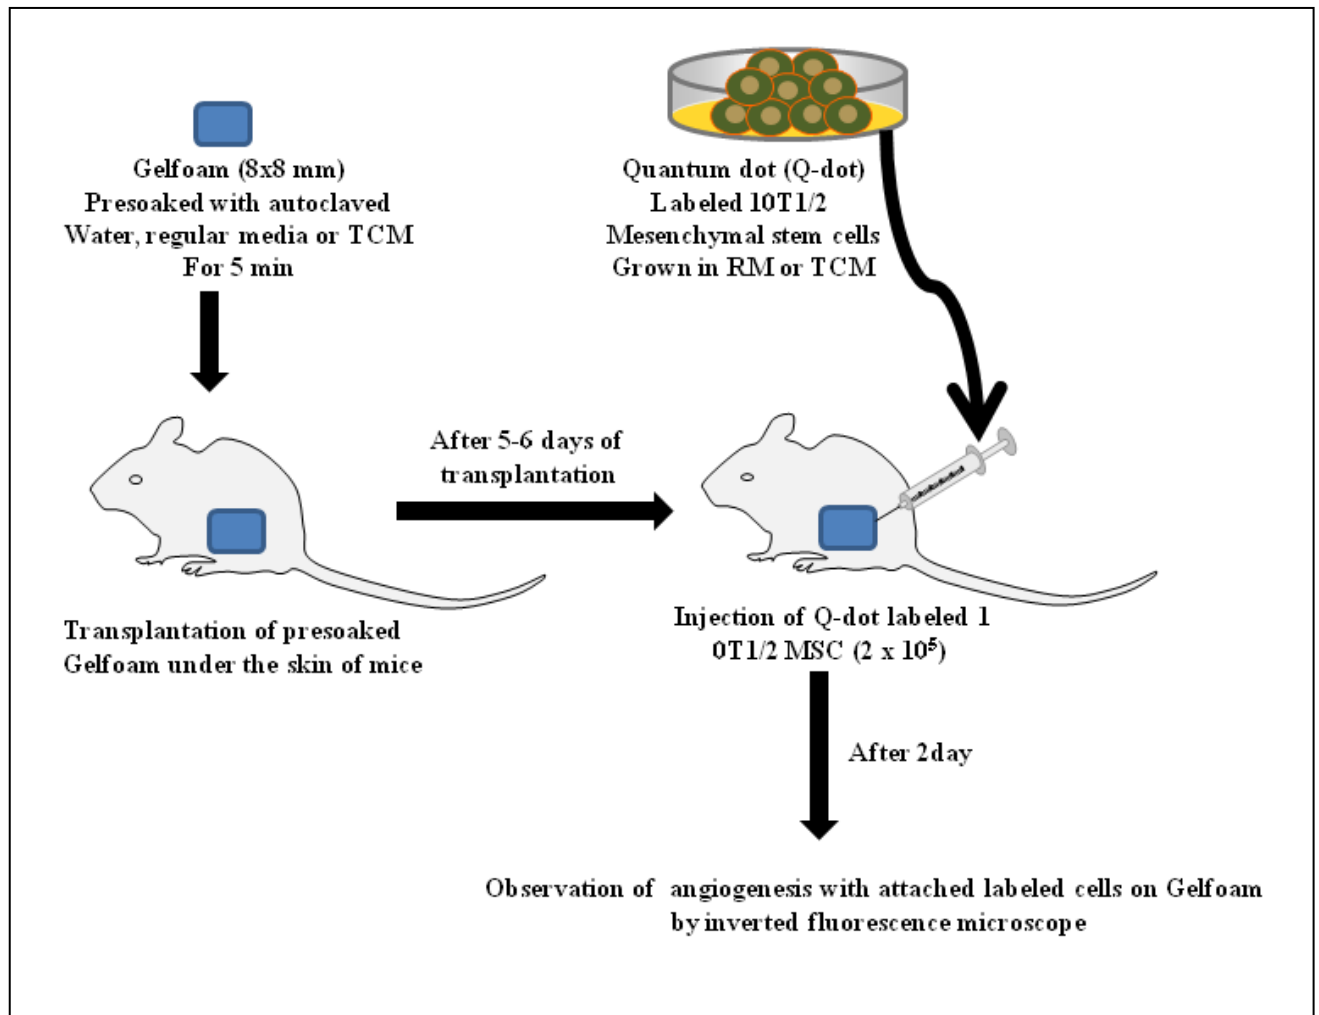

Supplement: MOESM1 [file 9554662]
